# Supplementary material
Source: Springer Nature journal article supplement (https://www.springermedizin.de/resource/supplementary/12891_2010_1087_MOESM1_ESM.pdf/9507684)

Uncompressed

Compressed

H&E

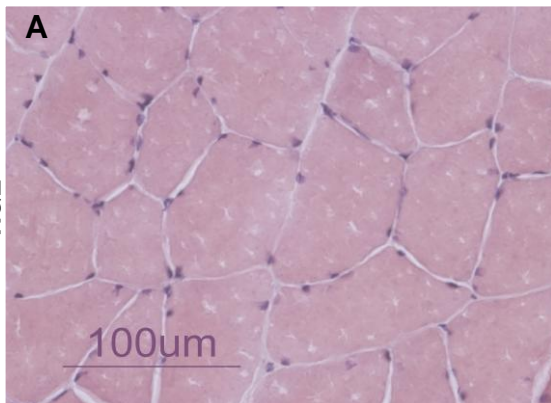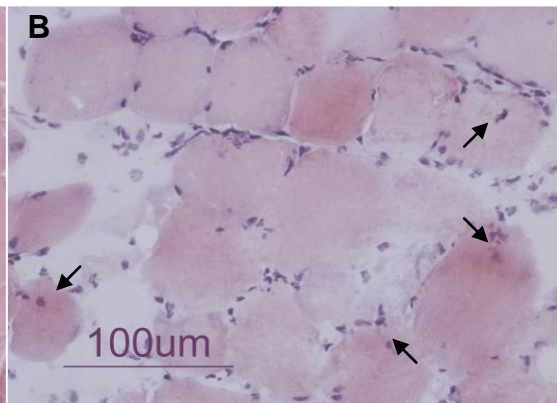

MAFbx/atroggin-1

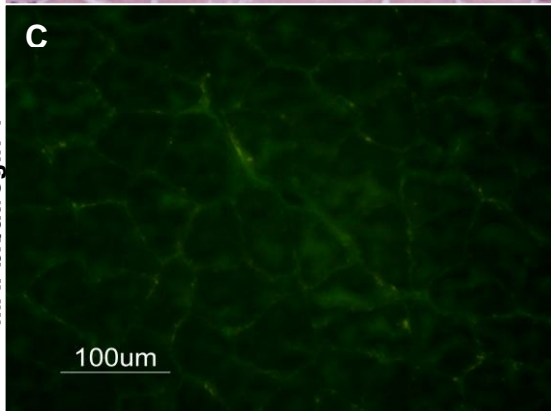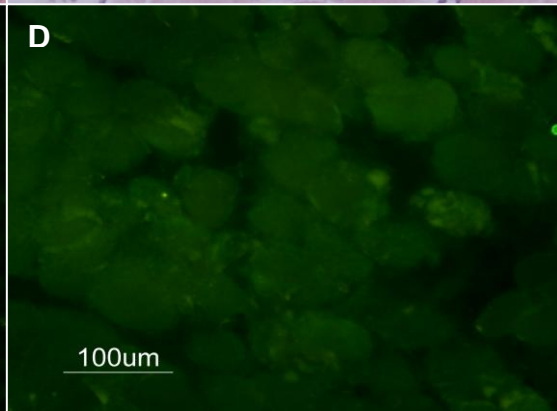

Supplement: MOESM1 [file 9507684]
